# Supplementary material for: Spectroscopic evidence for a high fraction of ferroelectric phase induced in electrospun polyvinylidene fluoride fibers
Source: Royal Society of Chemistry journal article supplement (doi:10.1039/c3ra42622j), 2013-01-01
Supplement: c3ra42622j.pdf [file c3ra42622j.pdf]

# Spectroscopic evidence for high fraction of ferroelectric phase induced in electrospun polyvinylidene fluoride fibers

Tingping Lei,<sup>1,2</sup> Xiaomei Cai,<sup>3</sup> Xiang Wang,<sup>1</sup> Lingke Yu,<sup>1</sup> Xingwang Hu,<sup>1</sup> Gaofeng Zheng,<sup>1</sup> Wenlong Lv,<sup>1,3</sup> Lingyun Wang,<sup>1</sup> Dezhi Wu,<sup>1</sup> Daoheng Sun,<sup>\*,1,4</sup> and Liwei Lin<sup>\*,1,4</sup>

<sup>1</sup>Department of Mechanical and Electrical Engineering, Xiamen University, Xiamen 361005, China

<sup>2</sup>College of Mechanical Engineering and Automation, Huaqiao University, Xiamen 361021, China

<sup>3</sup>School of Physics and Mechanical & Electrical Engineering, Xiamen University, Xiamen 361005, China

<sup>4</sup>Department of Mechanical Engineering, University of California, Berkeley, California 94720, USA

## I. FORCESPINNING

It is well known that the applied electrostatic field during electrospinning serves dual purposes: (1) mechanical stretching, and (2) electrical poling on the polymer jet. In this work, forcespinning which stretches the polymer jet through centrifugal forces without electric poling was utilized.<sup>1</sup> Several methodologies have been reported as the pure forcespinning techniques such as spin-coating and mechanical spinning.<sup>2,3</sup> Here, we used a drill machine (BG-5158, Beking, Co.) to produce fibers. After fixing the syringe and drill head together, the “standard” PVDF polymer solution was loaded into the syringe and wrapped with aluminum foil. Afterwards, the drill with a speed higher than 5,000 rpm was used to make fibers of different morphologies depending on the speed of the motor.

**Figure S1** shows the fiber morphology at different rotation speed: (a) 8,000 rpm; (b) 11,000 rpm; (c) and (d) are the enlarged pictures of (b). It is found that at a lower speed at 8000 rpm, forcespinning produces fibers with a large deviation in diameter. As the speed of the rotor increases, the diameter of forcespun fibers is reduced.

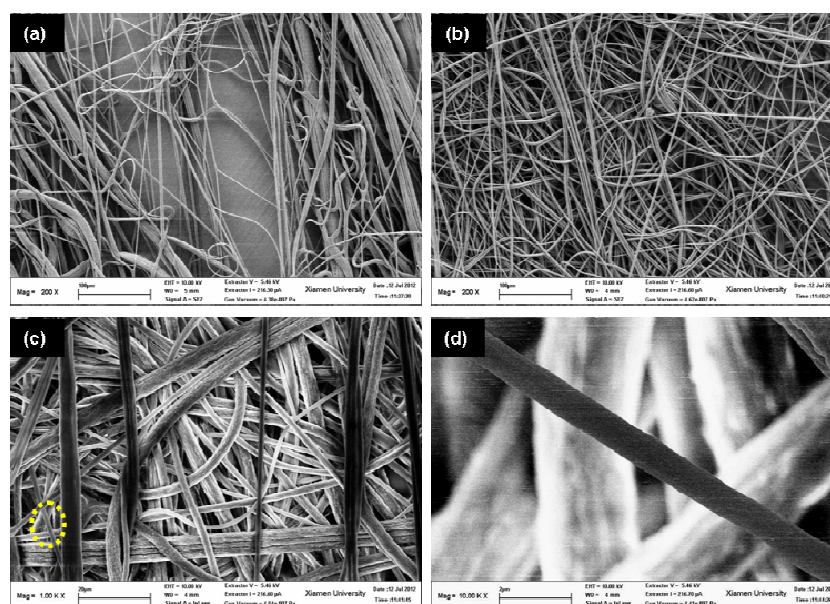

**Figure S1** SEM images of forcespun fibers. (a) 8,000 rpm; (b) 11,000 rpm; (c) and (d) enlarged pictures of (b)

## II. ELECTROSPINNING

**Figure S2** details the effects of PVDF wt% concentration and polymer solution flow rate on the fiber morphology and diameter distribution. A total of 50 measurements were made for each sample.

(A)

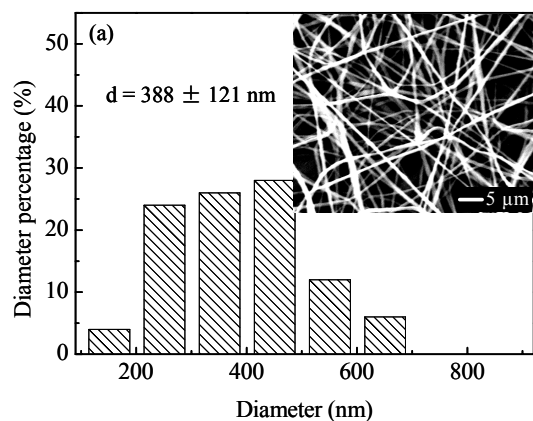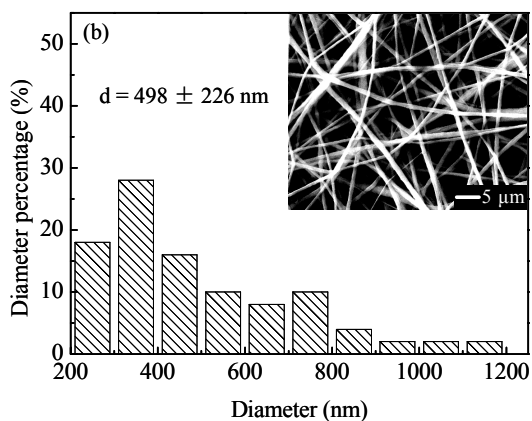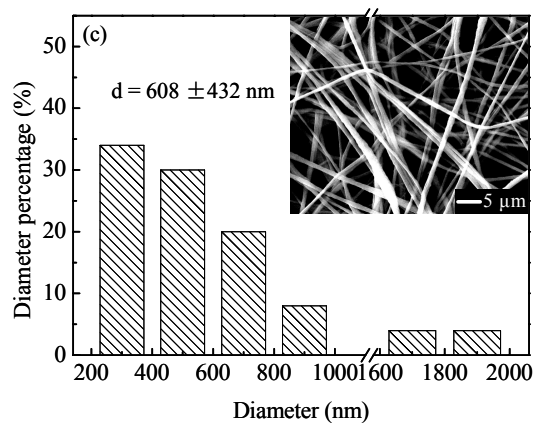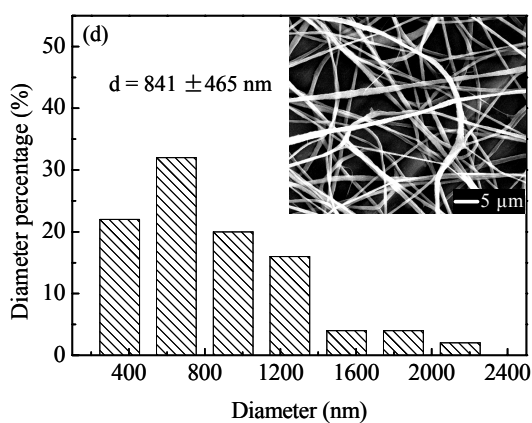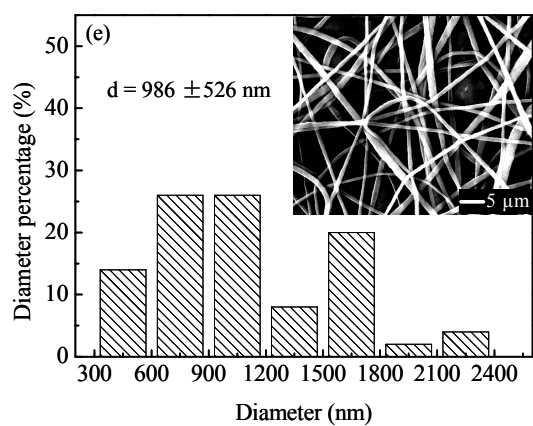

(B)

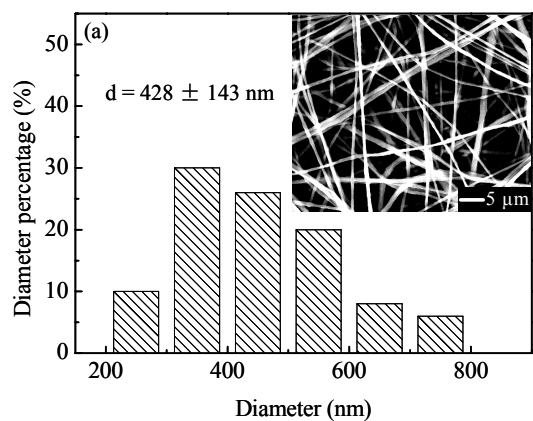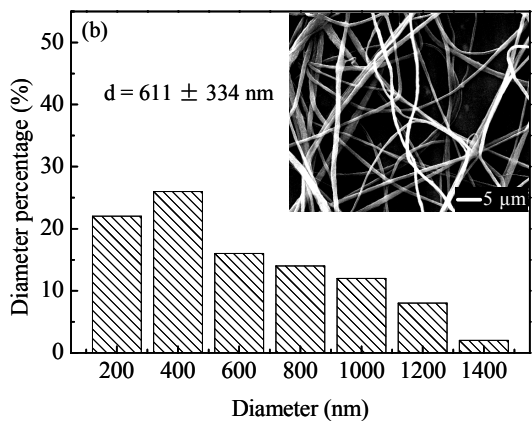

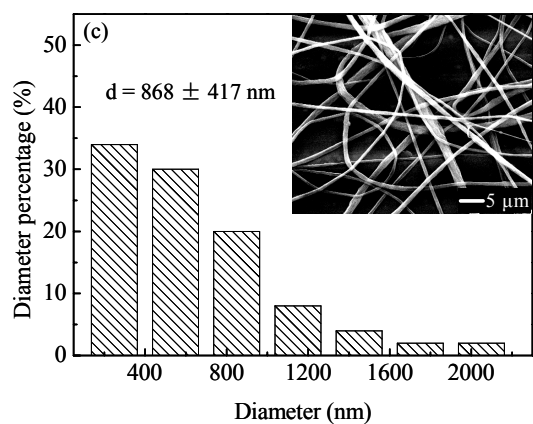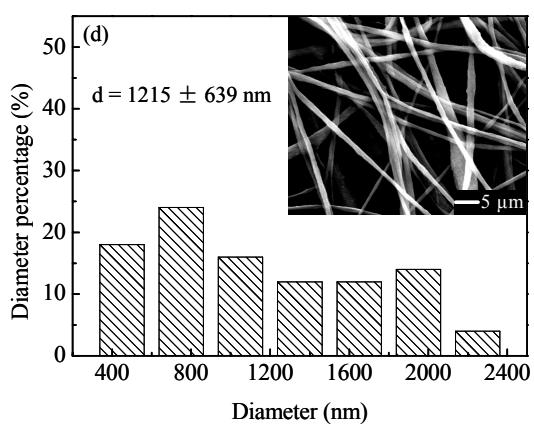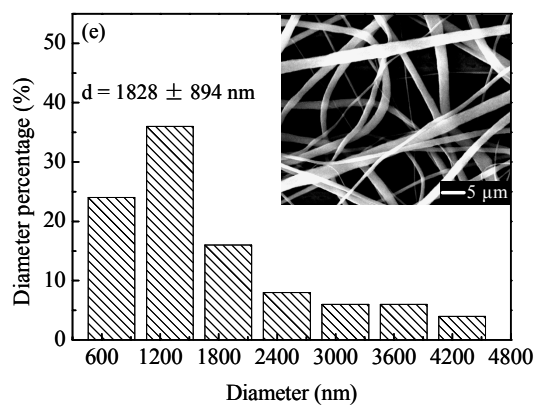

(C)

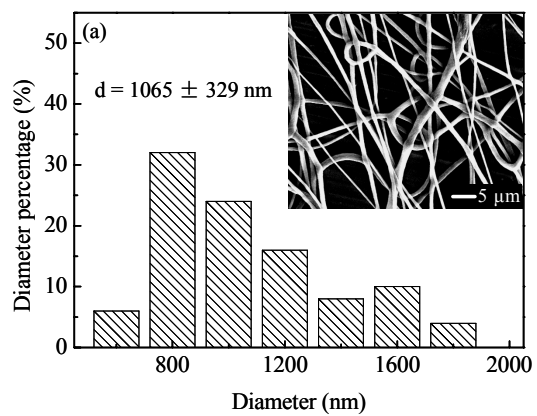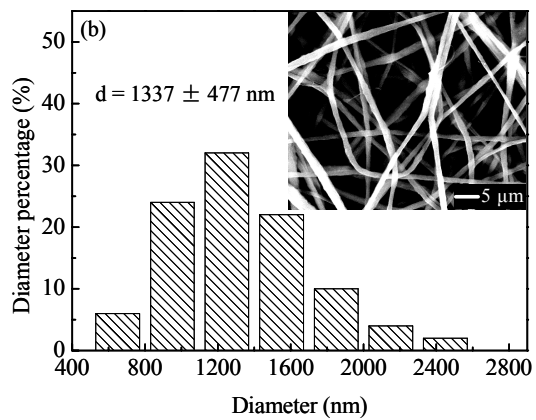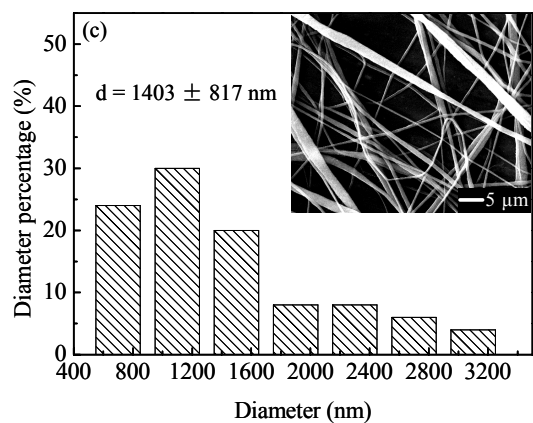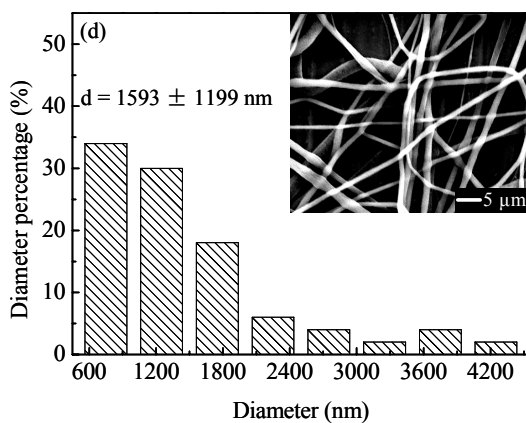

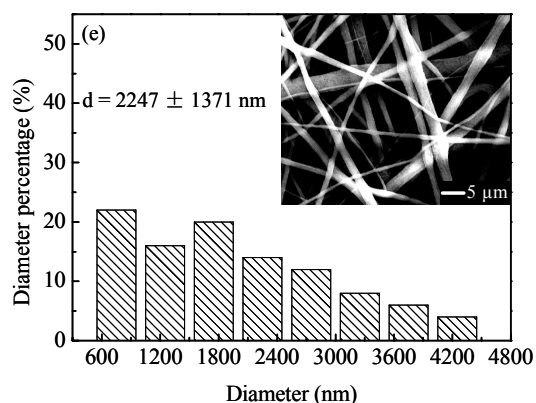

**Figure S2** SEM photos of electrospun fibers and size distribution of fiber diameters with (A) 11 wt%, (B) 16 wt%, and (C) 19 wt% of PVDF, respectively, under different polymer solution flow rate of: (a) 80  $\mu\text{L/hr}$ , (b) 200  $\mu\text{L/hr}$ , (c) 500  $\mu\text{L/hr}$ , (d) 1000  $\mu\text{L/hr}$ , and (e) 2000  $\mu\text{L/hr}$ , respectively.

**Figure S3** shows effect of applied voltage on the IR spectra of electrospun fibers made from baseline system (16 wt%,  $V_{\text{NMP}}/V_{\text{acetone}}=5/5$ ) with varying applied voltages from 4 to 11kV. The polymer solution flow rate and the tip-to-collector were 60  $\mu\text{L/hr}$  and 10 cm, respectively. It is found that the fraction of  $\beta$ -phase is very high for all samples ( $\geq 95\%$ ) and the influence of applied electrical field on the formation of  $\beta$ -phase is not significant.

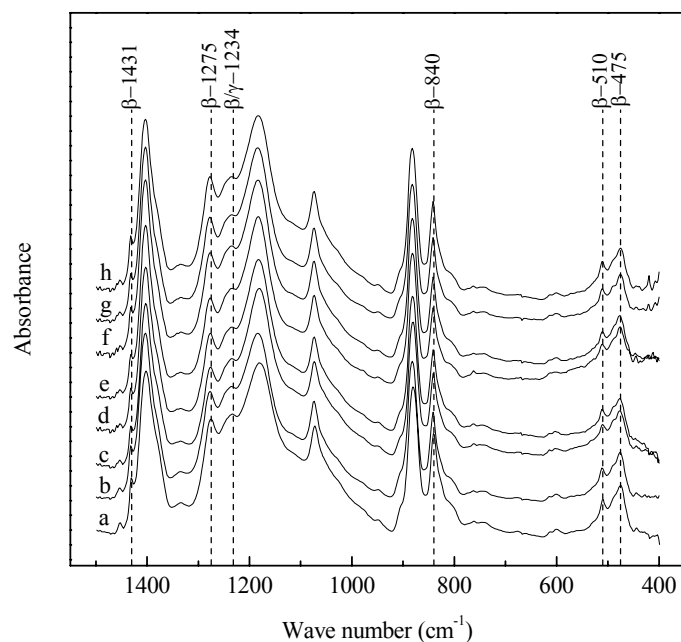

**Figure S3** Effect of applied voltage on the IR spectra of electrospun fibers: a, b, c, d, e, f, g and h, corresponding to 4, 5, 6, 7, 8, 9, 10, and 11 kV of applied voltages, respectively.

**Figure S4** shows the Infrared spectra of electrospun PVDF fibers prepared with 16 and 19 wt% PVDF with increasing flow rate from 80 to 2000  $\mu\text{L/hr}$ .

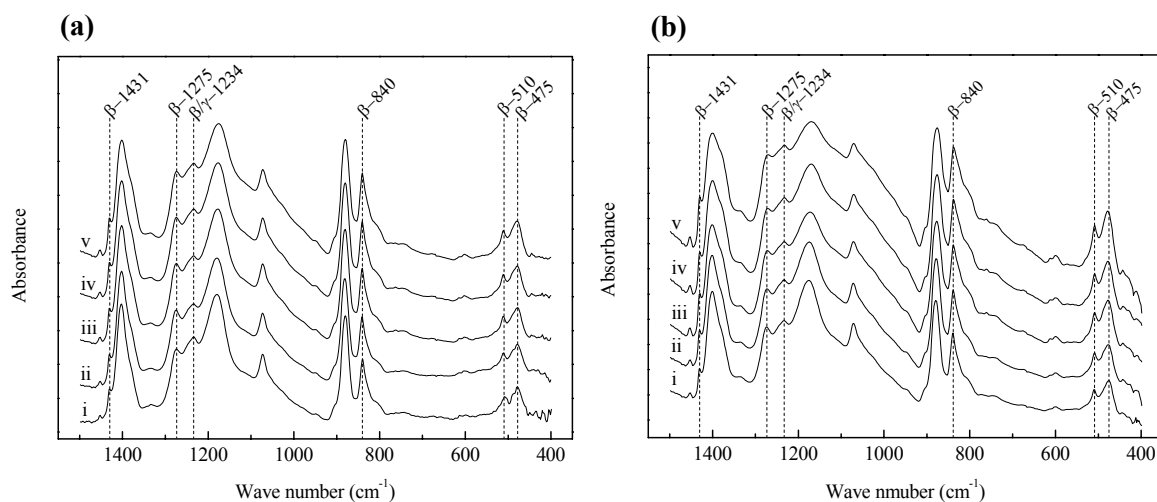

**Figure S4** Infrared spectra of electrospun PVDF fibers prepared with (a) 16, and (b) 19 wt% of PVDF concentration, respectively, under polymer solution flow rate at (i) 80  $\mu\text{L/hr}$ , (ii) 200  $\mu\text{L/hr}$ , (iii) 500  $\mu\text{L/hr}$ , (iv) 1000  $\mu\text{L/hr}$ , and (v) 2000  $\mu\text{L/hr}$ .

### III. SOLUTION-CASTING

**Figure S5** shows the IR spectra of thin films cast from NMP-rich ( $V_{\text{NMP}}/V_{\text{acetone}} = 9/1$ ) solutions with 16 wt% PVDF crystallized at different temperatures. The cast films are prepared by spreading PVDF solution onto a previously cleaned aluminum foil and then heated unless evaporation of the solvent is completed.

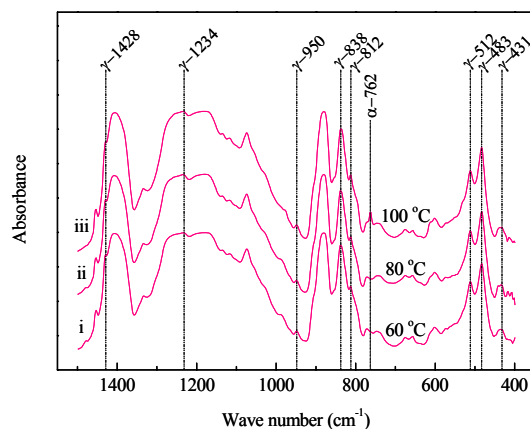

**Figure S5 (b)** Infrared spectra of films cast from NMP-rich ( $V_{\text{NMP}}/V_{\text{acetone}} = 9/1$ ) 16 wt% solutions and crystallized under different temperatures at: (i) 60 °C, (ii) 80 °C, and (iii) 100 °C.

### References

- 1 K. Sarkar, C. Gomez, S. Zambrano, M. Ramirez, E. de Hoyos, H. Vasquez, and K. Lozano, *Mater. Today*, 2010, **13**, 12-14.
- 2 R. Weitz, L. Harnau, S. Rauschenbach, M. Burghard and K. Kern, *Nano Lett.* 2008, **8**, 1187-1191.
- 3 M. R. Badrossamay, H. A. McIlwee, J. A. Goss and K. K. Parker, *Nano Lett.* 2010, **10**, 2257-2261.
